# Supplementary material for: Imaging modification of colon carcinoma cells exposed to lipid based nanovectors for drug delivery: a scanning electron microscopy investigation
Source: Royal Society of Chemistry journal article supplement (doi:10.1039/c9ra02381j), 2019-01-01
Supplement: c9ra02381j1.pdf [file c9ra02381j1.pdf]

## ELECTRONIC SUPPLEMENTARY INFORMATION

### Imaging modification of colon carcinoma cells exposed to lipid based nanovectors for drug delivery: a scanning electron microscopy investigation

Received 00th January 20xx,  
Accepted 00th January 20xx

DOI: 10.1039/x0xx00000x

Nicoletta Depalo,<sup>a\*</sup> Elisabetta Fanizza,<sup>a,b</sup> Fabio Vischio,<sup>b</sup> Nunzio Denora,<sup>a,c</sup> Valentino Laquintana,<sup>c</sup> Annalisa Cutrignelli,<sup>c</sup> Marinella Striccoli,<sup>a</sup> Gianluigi Giannelli,<sup>d</sup> Angela Agostiano,<sup>a,b</sup> Maria Lucia Curri,<sup>a,b</sup> Maria Principia Scavo<sup>d\*</sup>

M-14, CaCo-2 and CoLo205 cells were seeded on 1 cm<sup>2</sup> silicon chips at a density of 5×10<sup>3</sup> cells/well in 6-well plates and at a sub-confluent density, were exposed to 3 μM 5-FU concentration, for 24 and 48 hours. The fixation procedure and details on the measurements performed by using a Zeiss Sigma FE-SEM were reported in the Paragraph 2.11 of the manuscript. In Figure S1, S2 and S3 the representative micrographs obtained by FE-SEM analysis performed on the three different cell lines, after their incubation with free 5-FU for 24 and 48 hours have been reported.

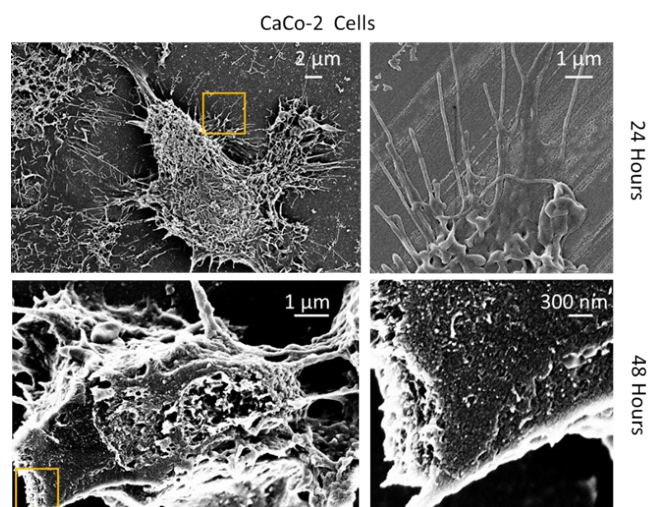

**Figure S 1** Representative FE-SEM micrographs (EHT= 3.00 kV) and their corresponding close-up details at higher magnification of CaCo-2 cells after their treatment free 5-FU (3 M) for 24 and 48 hours.

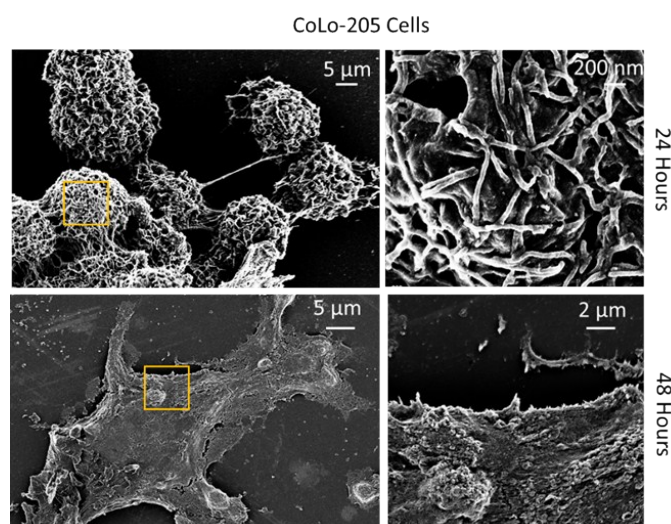

**Figure S 2** Representative FE-SEM micrographs (EHT= 3.00 kV) and their corresponding close-up details at higher magnification of CaLo-205 cells after their treatment free 5-FU (3 μM) for 24 and 48 hours.

<sup>a</sup>Institute for Chemical and Physical Processes (IPCF)-CNR SS Bari, Via Orabona 4, 70125 - Bari, Italy

<sup>b</sup>Università degli Studi di Bari Aldo Moro, Dipartimento di Chimica, Via Orabona 4, 70125 - Bari, Italy;

<sup>c</sup>Università degli Studi di Bari Aldo Moro, Dipartimento di Farmacia, Scienze del Farmaco, Via Orabona 4, 70125 - Bari, Italy

<sup>d</sup>Personalized Medicine Laboratory, National Institute of Gastroenterology - Research Hospital "S. De Bellis", Via Turi 27, Castellana Grotte (Bari), Italy

\*Co-Corresponding author

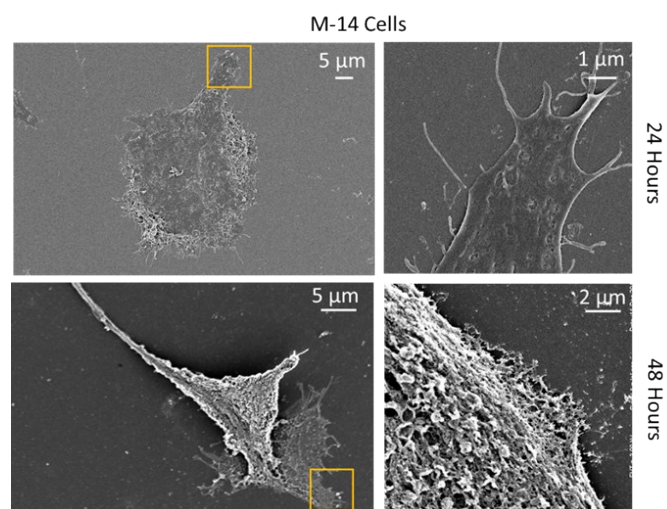

**Figure 5 3** Representative FE-SEM micrographs (EHT= 3.00 kV) and their corresponding close-up details at higher magnification of M-14 cells after their treatment free 5-FU (3  $\mu\text{M}$ ) for 24 and 48 hours.
